# Supplementary material
Source: PubMed Central journal article supplement (PMC3635740)
Supplement: JCI67356sd.pdf [file JCI67356sd.pdf]

## Supplemental Material

### Supplemental Figure 1

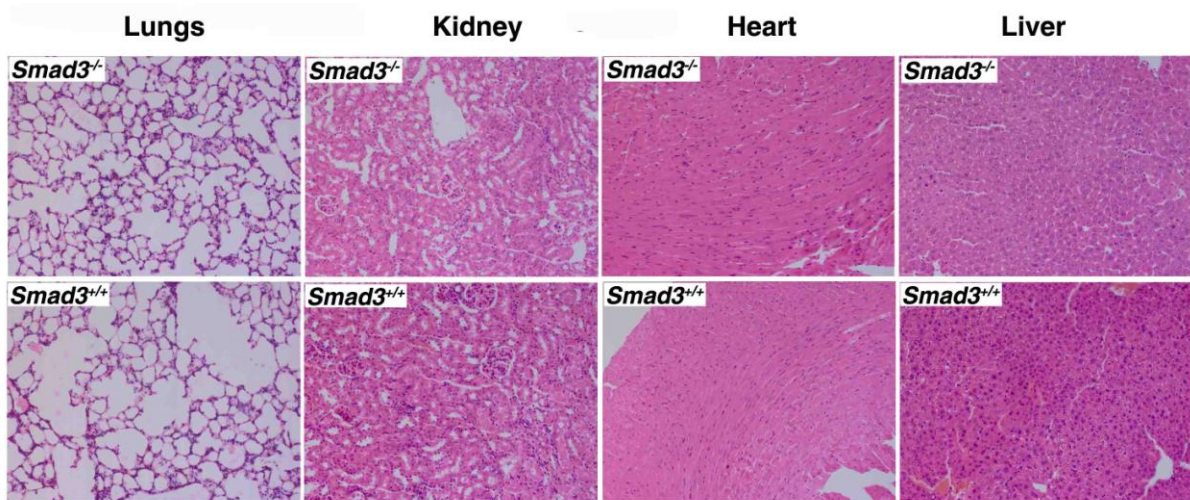

**Supplemental Figure 1.** Representative HE staining of the lungs, kidney, heart and liver from 1-mo-old *Smad3*<sup>+/+</sup> and *Smad3*<sup>-/-</sup> which were showed normal. There are no inflammation was found in these organs. Original magnification, 200 $\times$ .

### Supplemental Figure 2

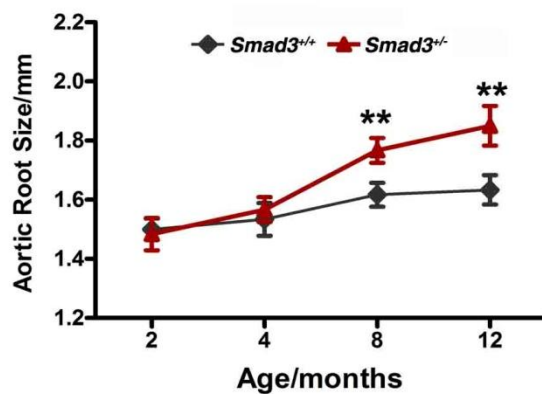

**Supplemental Figure 2.** Aortic root diameter, measured by echocardiography, at different ages of WT (*Smad3*<sup>+/+</sup>) (n=6/time points) and *Smad3*<sup>-/-</sup> (n=7/time points) mice. \*\* $P < 0.001$  *Smad3*<sup>-/-</sup> versus WT at the same age.

**Supplemental Figure 3**

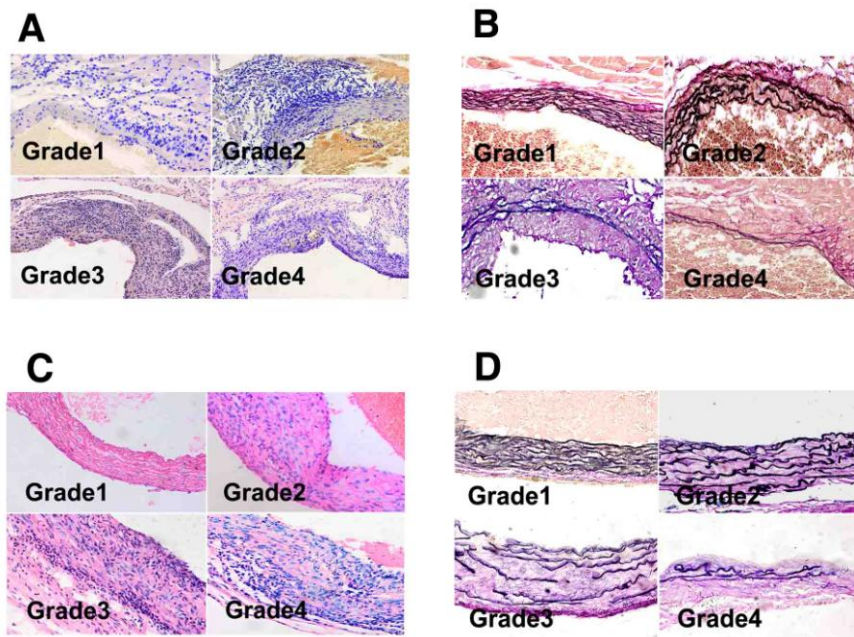

**Supplemental Figure 3.** Elastin degradation–grading (4 grades) keys (B, D) and inflammatory cell infiltration–grading (4 grades) (A, C) of aortic root (A, B) and ascending aortas (C, D) were shown. Original magnification, 400 $\times$ .

**Supplemental Figure 4**

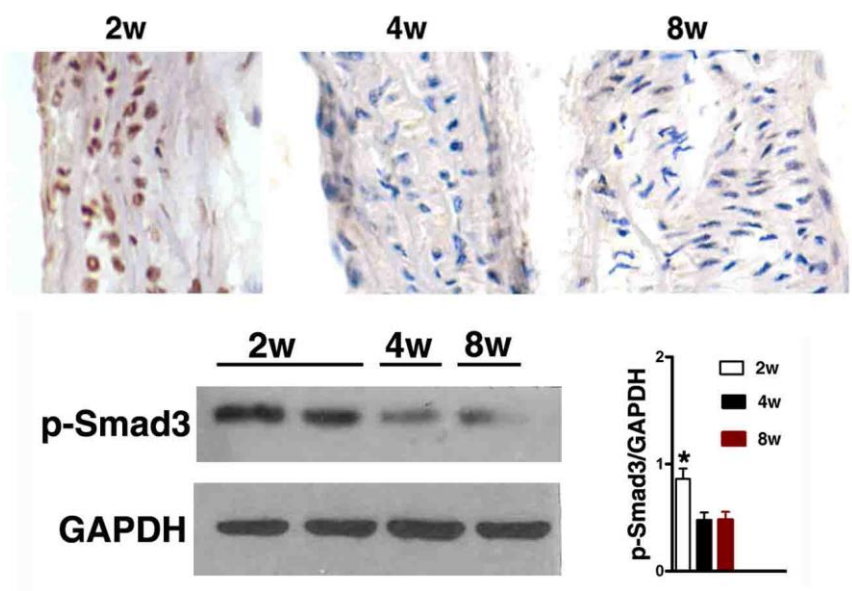

**Supplemental Figure 4.** The expression of p-Smad3 in the *Smad3*<sup>+/+</sup> mice. The image showed Immunostaining for p-Smad3 on slides of aortic root from *Smad3*<sup>+/+</sup> aged at 2, 4 and 8 weeks. Representative Western blot showing p-Smad3 levels in

proximal ascending aortas from *Smad3*<sup>+/+</sup> mice aged at 2, 4 and 8 weeks. The ratio between p-Smad3 to GAPDH levels is shown. \**P* < 0.01, vs 4 or 8 weeks. Original magnification, 400 $\times$ .

**Supplemental Figure 5**

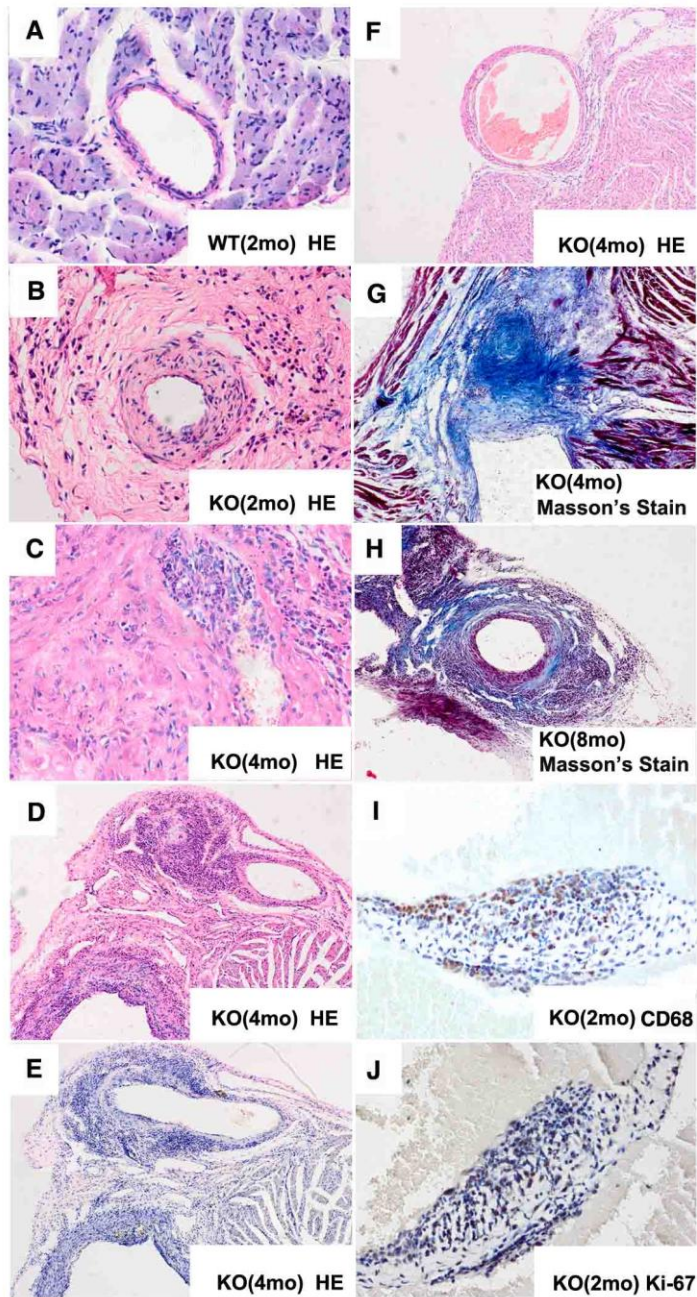

**Supplemental Figure 5.** Inflammation in the coronary arteries and aortic valves from *Smad3*<sup>-/-</sup> mice. **A**, HE staining showing normal coronary arteries from *Smad3*<sup>+/+</sup> mice. **B**, Intimal thickening. **C**, Inflammatory cells accumulating in the vascular space. **D**, Complete occlusion of the coronary artery. **E, F**, Coronary artery ectasia. **G, H**, Varying degrees of vascular fibrosis. **I, J**, Adhesion of CD68<sup>+</sup> cells to the aortic valve and expression of Ki-67, a cell proliferation marker. Original magnification, (D, E, F, H): 100×; (A, B, C, G): 400×.

**Supplemental Figure 6**

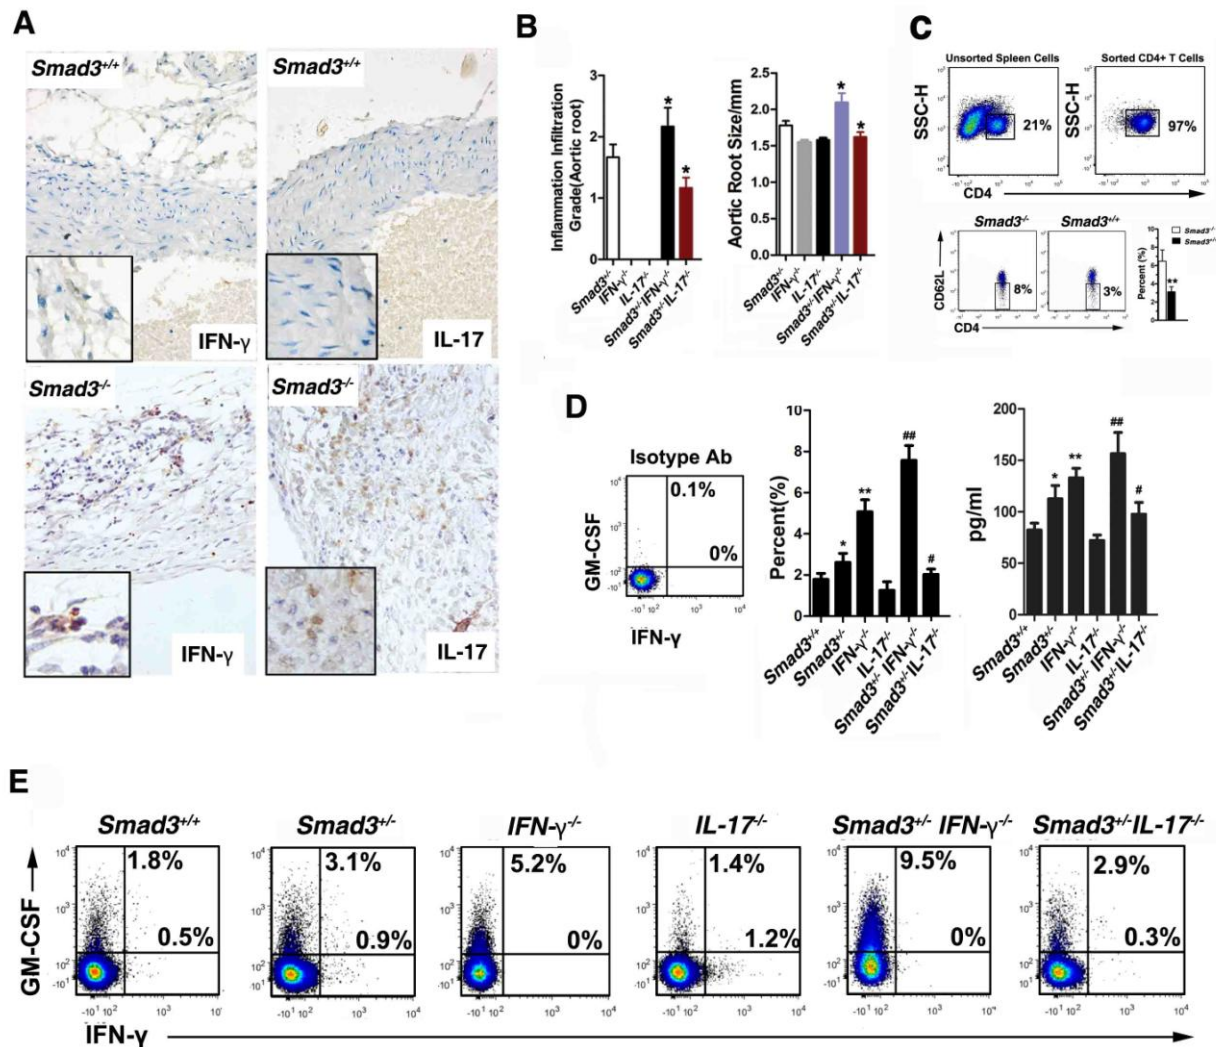

**Supplemental Figure 6.** IFN- $\gamma$  and IL-17 play opposite role on regulation of GM-CSF secretion by CD4<sup>+</sup> T cells, which impact the aortic pathological changes of *Smad3*<sup>-/-</sup> mice. **A**, Immunostaining with the IFN- $\gamma$  and IL-17 antibody revealed an accumulation of IFN- $\gamma$ - and IL-17-producing cells in the aortas of *Smad3*<sup>-/-</sup> mice, and no obvious positive staining was observed in the aortas of *Smad3*<sup>+/+</sup> mice. Original magnification, 400×; Magnified panels, 1000×. **B**, The histograms show different inflammation severity and aortic root size in the aortic roots from 6 genetically engineered mice, which exhibited worse inflammation severity in *Smad3*<sup>-/-</sup> *IFN* $\gamma$ <sup>-/-</sup> mice, while *Smad3*<sup>-/-</sup> *IL*-17<sup>-/-</sup> mice showed slightly better than the *Smad3*<sup>-/-</sup> mice. \**P* < 0.01 vs *Smad3*<sup>-/-</sup> mice. **C**, Flow cytometry analysis of the sorting efficiency of CD4<sup>+</sup> T cells. *Smad3*<sup>-/-</sup> mice contains more CD4<sup>+</sup>CD62L<sup>+</sup> cells in the spleen than *Smad3*<sup>+/+</sup> mice, which showed an activated phenotype. **D**, IFN- $\gamma$  deficiency promoted GM-CSF secretion in CD4<sup>+</sup> T cells from WT and *Smad3*<sup>-/-</sup> mice, while IL-17 deficiency had a slight

inhibitory effect. The amount of GM-CSF in the supernatants was measured using a specific ELISA kit and was consistent with flow cytometry results. \* $P < 0.05$ , \*\* $P < 0.01$  versus WT. # $P < 0.05$ , ## $P < 0.01$  versus *Smad3*<sup>+/+</sup>. **E**, Flow cytometry analysis of the secretion of GM-CSF and IFN- $\gamma$  by CD4<sup>+</sup> T cells. Isotype control Abs were added for gating.

**Supplemental Figure 7**

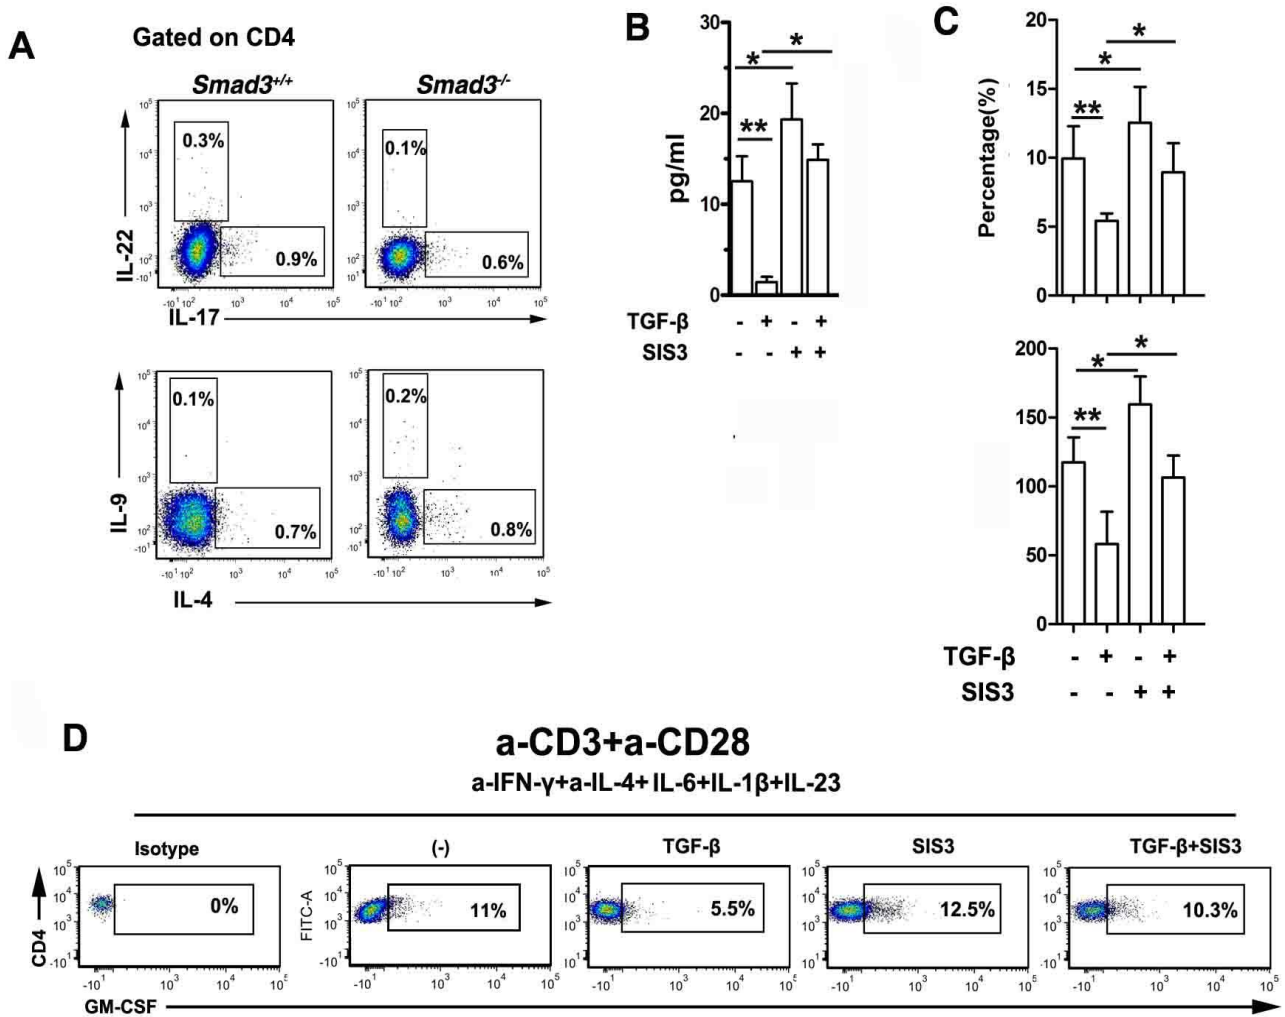

**Supplemental Figure 7. A**, Under neutral priming conditions in spleen cells, *Smad3*<sup>-/-</sup>CD4<sup>+</sup> T cells appeared to have the same ability to secrete IL-4, IL-9, IL-22, and IL-17. Representative flow cytometry image were shown. **B**, GM-CSF concentration in the suspension were compared when isolated spleen CD4<sup>+</sup>T cells were under neutral priming conditions with or without the addition of TGF- $\beta$ /SIS3. \* $P < 0.05$ , \*\* $P < 0.01$ . **C**. Isolated spleen CD4<sup>+</sup>T cells were transformed under GM-CSF priming conditions with or without the addition of TGF- $\beta$ /SIS3. The percentage of CD4<sup>+</sup> T cells producing GM-CSF and GM-CSF concentration in the suspension were compared between different groups. \* $P < 0.05$ , \*\* $P < 0.01$ . **D**. Intracellular cytokine staining was performed to determine the percentage of CD4<sup>+</sup> T cells producing GM-CSF. Representative flow cytometry image were shown.

[illegible]

59

**Supplemental Table 1. Clinical information of study participants**

|                                                    | <b>Case1</b> | <b>Case2</b> |
|----------------------------------------------------|--------------|--------------|
| <b>Age(years)</b>                                  | 35           | 40           |
| <b>Gender</b>                                      | F            | M            |
| <b>Smoking</b>                                     | NO           | NO           |
| <b>Hypertension</b>                                | NO           | NO           |
| <b>Atrial fibrillation</b>                         | YES          | NO           |
| <b>Thoracic aortic aneurysm</b>                    | YES          | YES          |
| <b>Diameter of aneurysm(cm)</b>                    | 6.4          | 5.4          |
| <b>Abdominal aortic aneurysm</b>                   | NO           | NO           |
| <b>Aortic dissection/rupture</b>                   | NO           | NO           |
| <b>Aortic tortuosity</b>                           | YES          | NO           |
| <b>Ventricular hypertrophy</b>                     | NO           | YES          |
| <b>Mitral valve anomalies</b>                      | YES          | NO           |
| <b>Congenital heart malformation</b>               | NO           | NO           |
| <b>Osteoarthritis of <math>\geq 1</math> joint</b> | YES          | YES          |
| <b>Joint laxity</b>                                | NO           | NO           |
| <b>Painful joints</b>                              | YES          | YES          |
| <b>Skeletal anomalies</b>                          | NO           | YES          |
| <b>Hypertelorism</b>                               | NO           | YES          |
| <b>Abnormal palate or uvula</b>                    | NO           | NO           |
| <b>Velvety skin</b>                                | NO           | NO           |
